# Supplementary material for: Thio-assisted reductive electrolytic cleavage of lignin β-O-4 models and authentic lignin
Source: Royal Society of Chemistry journal article supplement (doi:10.1039/d0gc03597a), 2020-12-10
Supplement: d0gc03597a1.pdf [file d0gc03597a1.pdf]

Supporting Information

## **Thio-assisted reductive electrolytic cleavage of lignin $\beta$ -O-4 models and authentic lignin**

Zhen Fang,<sup>a,b</sup> Michael G. Flynn,<sup>a</sup> James E. Jackson<sup>\*c</sup> and Eric L. Hegg<sup>\*a,b</sup>

<sup>a</sup> Department of Biochemistry & Molecular Biology, Michigan State University, 603 Wilson Rd, East Lansing, Michigan 48824, USA.

<sup>b</sup> Great Lakes Bioenergy Research Center, Michigan State University, 164 Food Safety and Toxicology Building, East Lansing, Michigan 48824, USA

<sup>c</sup> Department of Chemistry, Michigan State University, 578 S Shaw Ln, East Lansing, Michigan 48824, USA

Correspondence: erichegg@msu.edu; jackson@chemistry.msu.edu

### Table of Contents

|                                                                               |    |
|-------------------------------------------------------------------------------|----|
| Various controls of thio-assisted electrolysis of 2-phenoxyacetophenone ..... | 2  |
| Various controls of thio-assisted electrolysis of dimer <b>1a-c</b> .....     | 9  |
| Characterization of thio-assisted electrolysis of lignin <sup>ox</sup> .....  | 13 |
| NMR spectra of dimer <b>1a-c</b> .....                                        | 16 |
| Cyclic voltammetry of 2,2'-dithiodiethanol .....                              | 19 |

## Various controls of thio-assisted electrolysis of 2-phenoxyacetophenone

### General Condition of Thio-assisted Cathodic Electrolysis of 2-phenoxyacetophenone

Reactions were conducted at room temperature up to 2.5 h in an H-type electrochemical cell (separated by a Nafion 117 membrane) wherein a platinum wire in 20 mL of pH 8 phosphate buffer was placed in the anode half-cell and the reticulated vitreous carbon (RVC) cathode had 2 cm<sup>2</sup> immersed in the catholyte, consisting of 50 mM LiBF<sub>4</sub> in 20 mL of DMF. Current (5 mA) was then applied for the duration of the experiment.

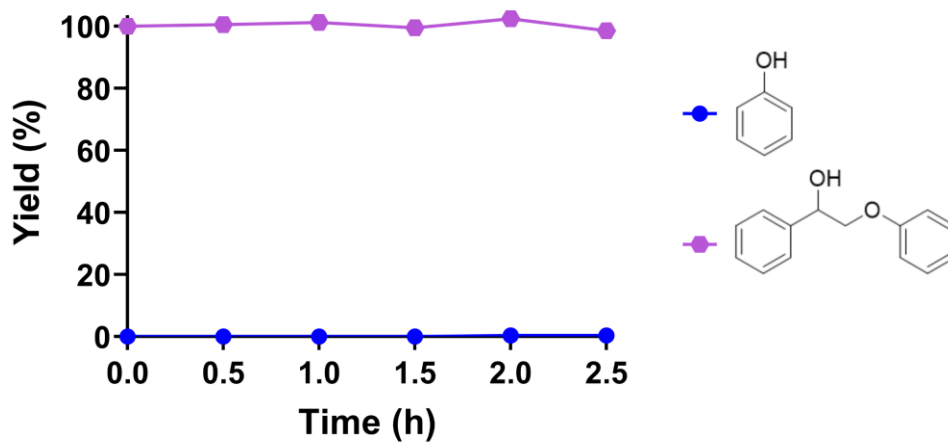

**Figure S1.** Electrolysis of 2-phenoxy-1-phenylethanol (parent alcohol analog of 2-phenoxyacetophenone) only (no thiol or disulfide). Procedure: 2-phenoxy-1-phenylethanol (4.7 mM) was added to the catholyte at  $t = 0$  and current (5 mA) and stirring were applied for the duration of the experiment.

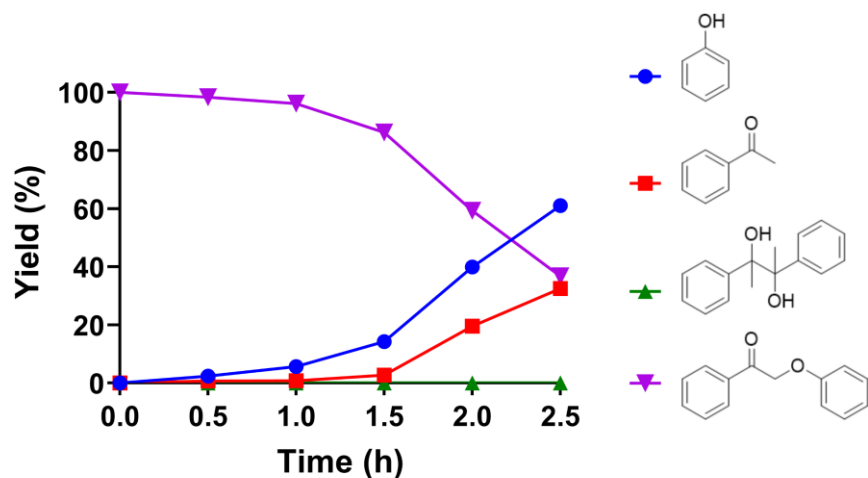

**Figure S2.** Cleavage of 2-phenoxyacetophenone electrolysis in the presence of cystine . Procedure: cystine (4.7 mM) and 2-phenoxyacetophenone (4.7 mM) were added to the catholyte at  $t = 0$ . Current (5 mA) and stirring were then applied for the duration of the experiment.

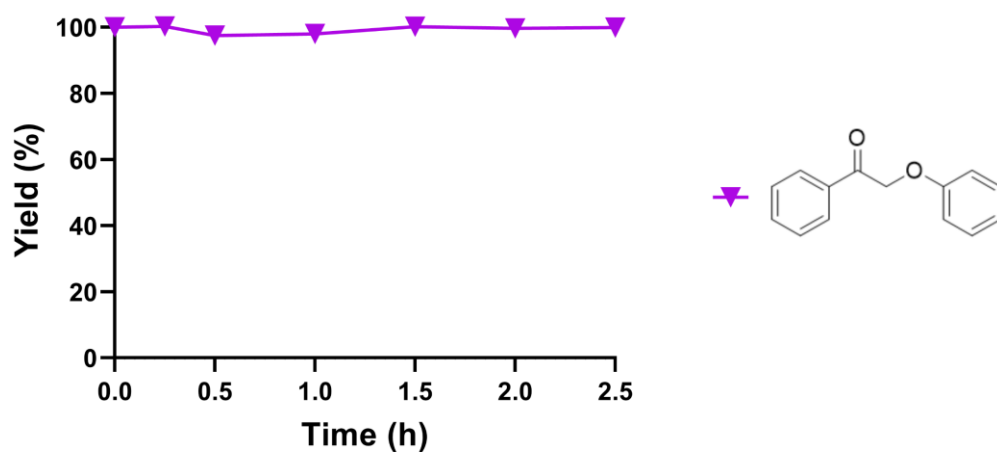

**Figure S3.** Simple (no electrolysis) treatment of 2-phenoxyacetophenone (4.7 mM) with  $\beta$ -mercaptoethanol (9.4 mM),  $\text{LiBF}_4$  (4.7 mM) and  $\text{K}_2\text{CO}_3$  (2 eq) in DMF (20 mL) at room temperature. No phenol product was detected at any time.

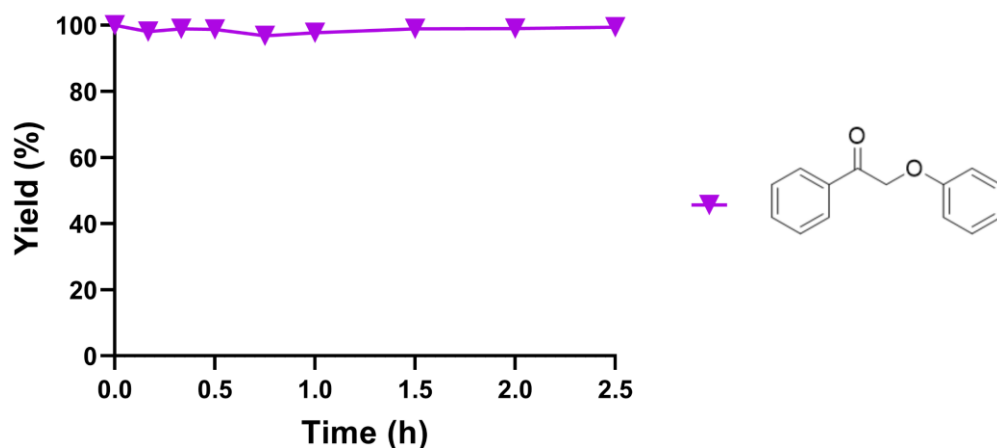

**Figure S4.** Simple (no electrolysis) treatment of 2-phenoxyacetophenone (4.7 mM) with  $\beta$ -mercaptoethanol (9.4 mM) and  $\text{Et}_3\text{N}$  (9.4 mM) in DMF (20 mL) at room temperature. No phenol product was detected at any time.

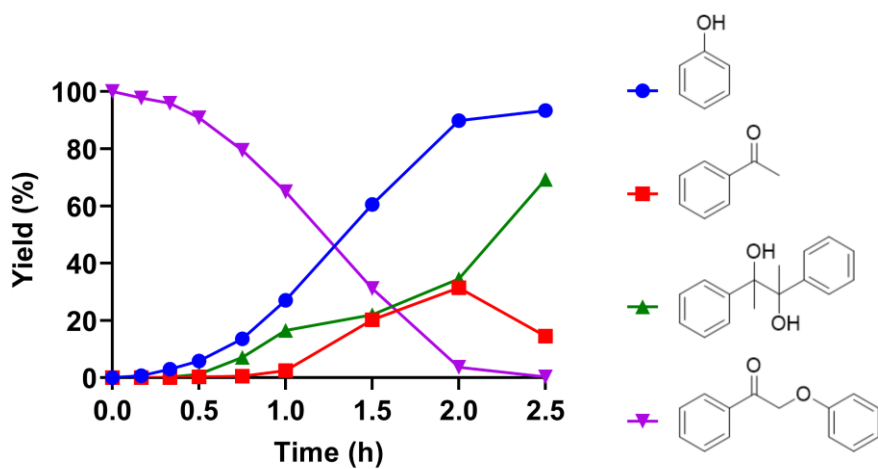

**Figure S5.** Cleavage of 2-phenoxyacetophenone with 2,2'-dithiodiethanol, pre-electrolyzed for 30 min. Procedure: 2,2'-dithiodiethanol (4.7 mM) was pre-electrolyzed at 5 mA in the stirring catholyte for 30 min; 2-phenoxyacetophenone (4.7 mM) was then added at  $t = 0$ . The 5 mA current and stirring were maintained throughout the entire reaction.

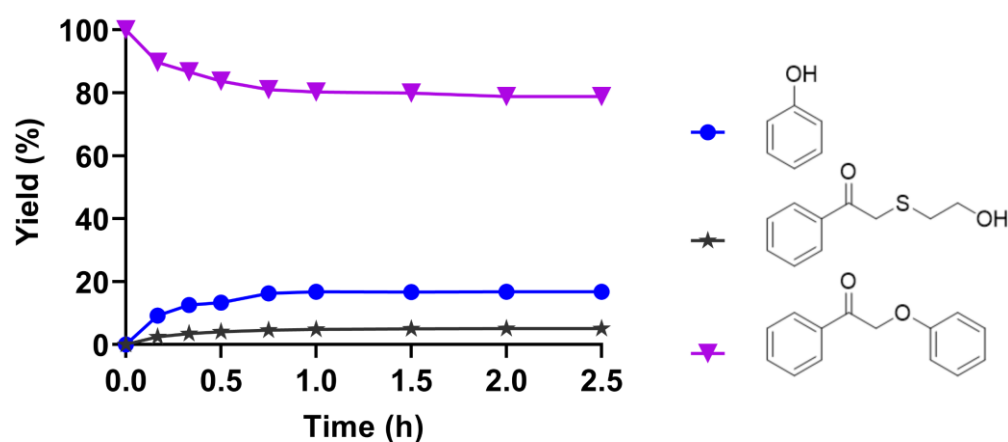

**Figure S6.** Cleavage of 2-phenoxyacetophenone/BHT mixture with 2,2'-dithiodiethanol, pre-electrolyzed for 1 h. Procedure: 2,2'-dithiodiethanol (4.7 mM) was pre-electrolyzed in the stirring catholyte at 5 mA for 1 h; the current was then turned off, and BHT (4.7 mM) and 2-phenoxyacetophenone (4.7 mM) were added to the stirred solution at  $t = 0$ . Stirring, but no current, was continued for the duration of the experiment.

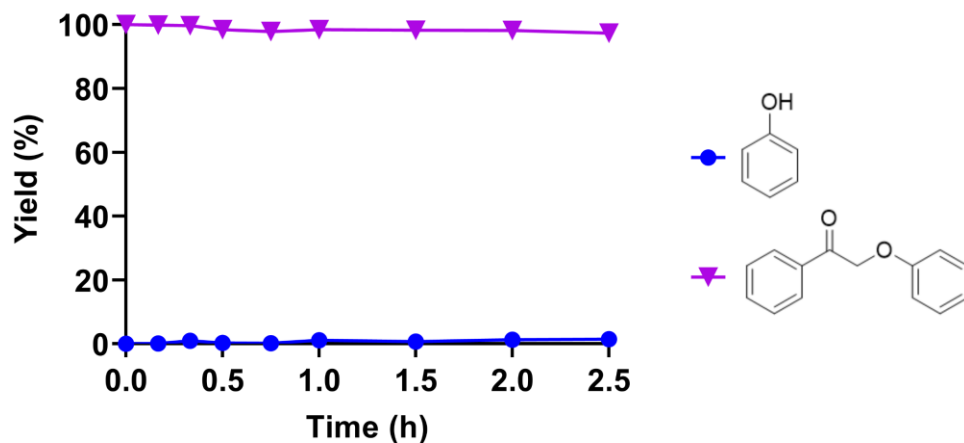

**Figure S7.** Reaction of 2-phenoxyacetophenone with 2,2'-dithiodiethanol, pre-electrolyzed for 1 h, modified by BHT addition and a waiting period. Procedure: 2,2'-dithiodiethanol (4.7 mM) was pre-electrolyzed at 5 mA with stirring in the catholyte for 1 h; the current was then turned off, BHT (4.7 mM) was added, and the mixture was stirred for 30 min; 2-phenoxyacetophenone (4.7 mM), was then added, defining  $t = 0$ . Stirring, but no current, was continued for the duration of the experiment.

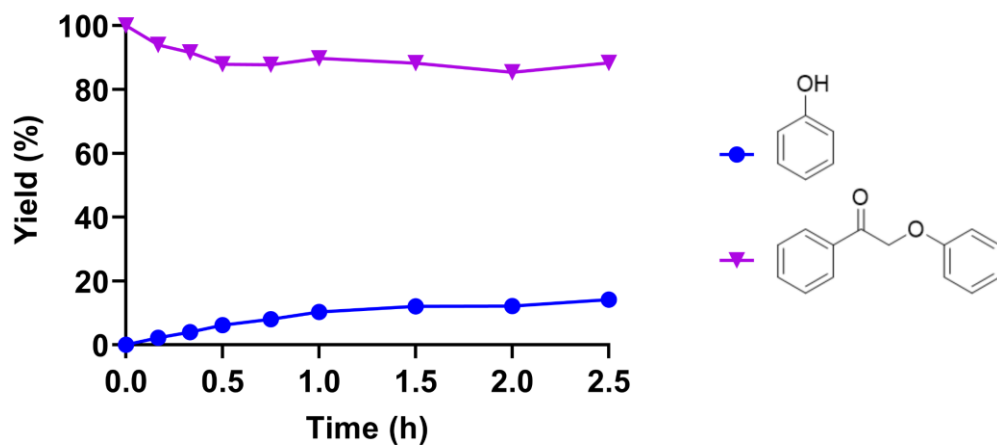

**Figure S8.** Reaction of 2-phenoxyacetophenone with 2,2'-dithiodiethanol, pre-electrolyzed for 1 h without addition of BHT. Procedure: 2,2'-dithiodiethanol (4.7 mM) was pre-electrolyzed at 5 mA with stirring in the catholyte for 1 h; stirring was continued with the current off for 30 min; 2-phenoxyacetophenone (4.7 mM) was then added at  $t = 0$ . Stirring, but no current, was continued for the duration of the experiment.

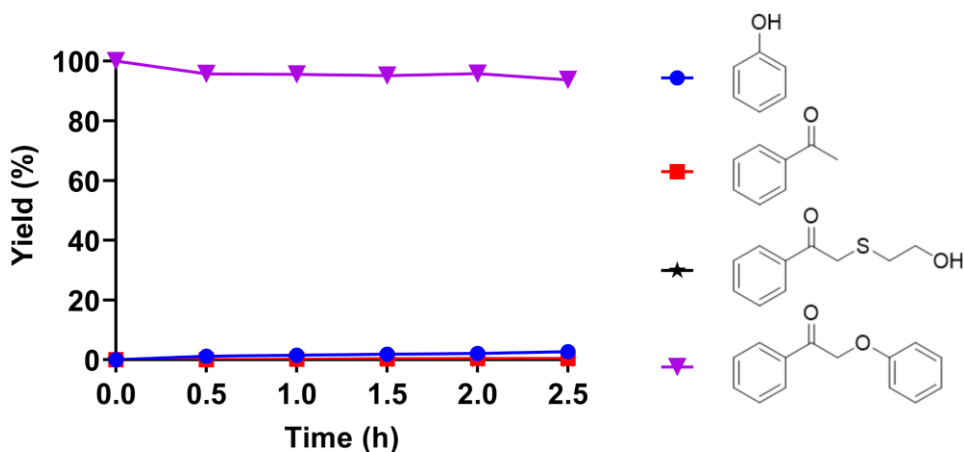

**Figure S9.** Reaction of 2-phenoxyacetophenone (4.7 mM) with  $\beta$ -mercaptoethanol (9.4 mM) with AIBN (azobisisobutyronitrile, 0.7 mM) in DMF (20 mL) at 100 °C without any electric current. Only trace amounts of the three products were detectable.

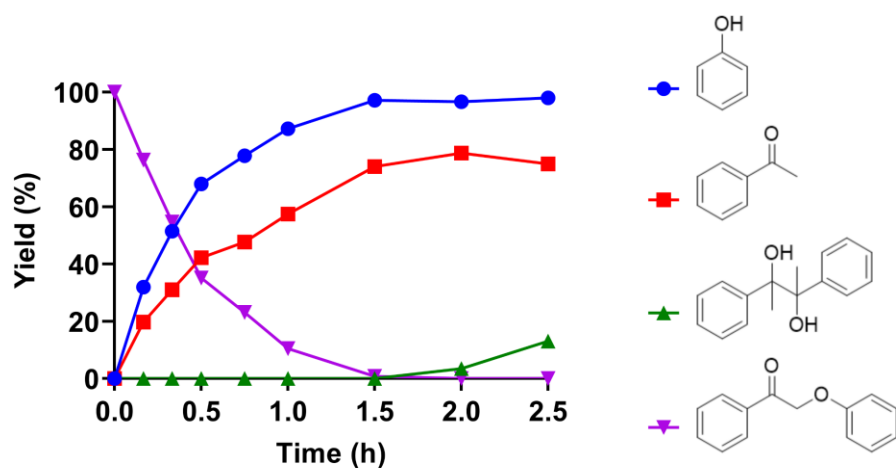

**Figure S10.** Cleavage of a 2-phenoxyacetophenone/BHT mixture with 2,2'-dithiodiethanol, pre-electrolyzed for 30 min. Procedure: 2,2'-dithiodiethanol (4.7 mM) was pre-electrolyzed at 5 mA in the stirring catholyte for 30 min; BHT (9.4 mM) and 2-phenoxyacetophenone (4.7 mM) were then added together at  $t = 0$ , and current and stirring were continued for the duration of the reaction.

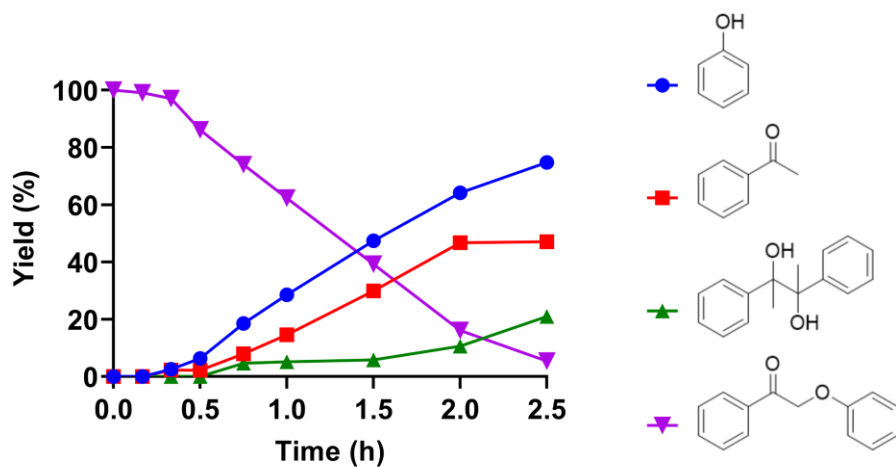

**Figure S11.** Cleavage of 2-phenoxyacetophenone by electrolysis of 2,2'-dithiodiethanol (4.7 mM) and BHT (4.7 mM) with 5 mA current. Procedure: 2,2'-dithiodiethanol (4.7 mM), BHT (4.7 mM) and 2-phenoxyacetophenone (4.7 mM) were solubilized with stirring in the catholyte. At  $t=0$ , current was applied and continued with stirring for the duration of the reaction.

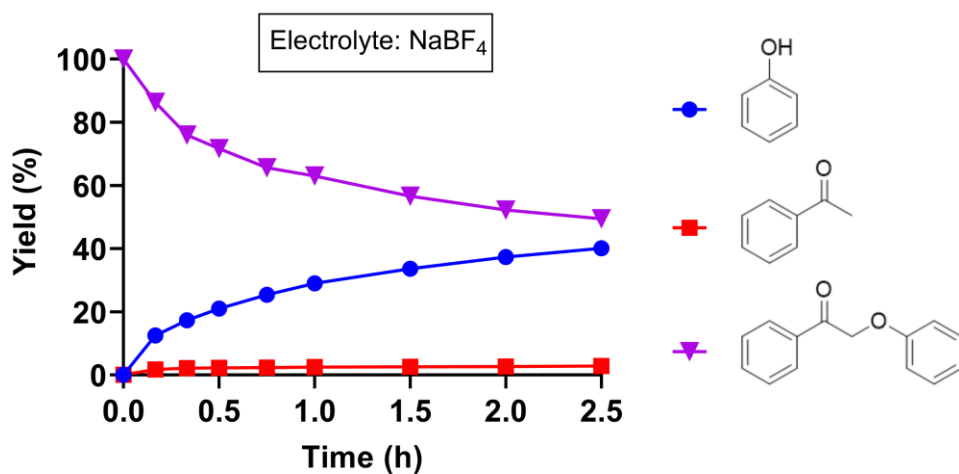

**Figure S12.** Cleavage of 2-phenoxyacetophenone with 2,2'-dithiodiethanol, pre-electrolyzed for 1 h, and using NaBF<sub>4</sub> as electrolyte. Procedure: 2,2'-dithiodiethanol (4.7 mM) was pre-electrolyzed at 5 mA for 1 h in a stirred catholyte (20 mL) in which NaBF<sub>4</sub> (50 mM) was employed instead of LiBF<sub>4</sub>; 2-phenoxyacetophenone (4.7 mM) was then added at t = 0 and current and stirring were continued for the duration of the reaction. Though only traces of acetophenone were seen, no pinacol product was observed.



## Various controls of thio-assisted electrolysis of dimer **1a-c**

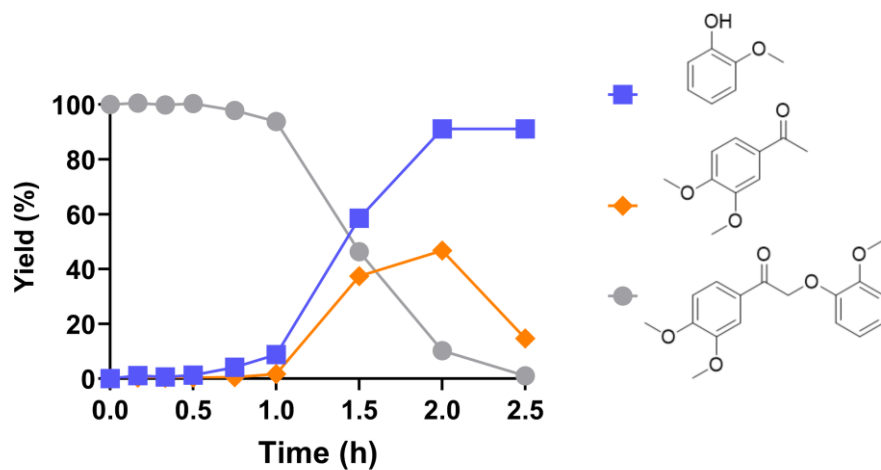

**Figure S13.** Cleavage of dimer **1a** with current alone. Procedure: dimer **1a** (3.3 mM) was added to the catholyte at  $t = 0$ , and current (5 mA) and stirring were continued for the duration of the reaction.

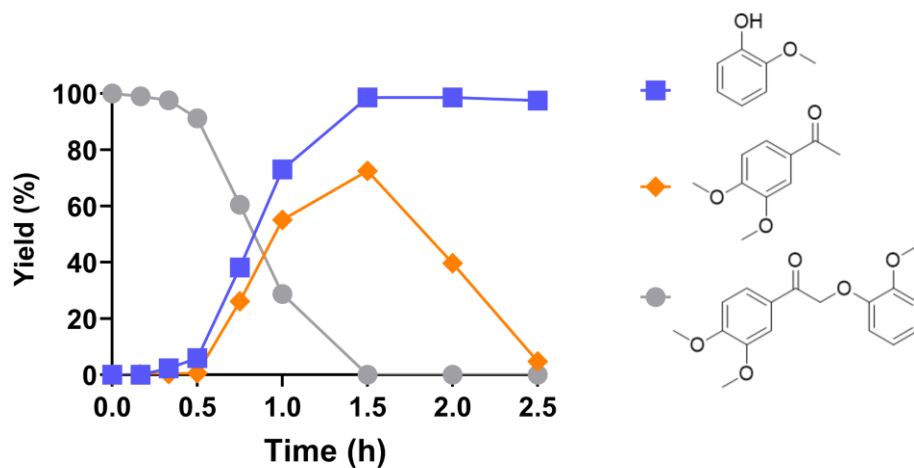

**Figure S14.** Cleavage of dimer **1a** with 2,2'-dithiodiethanol, pre-electrolyzed for 43 min. Procedure: 2,2'-dithiodiethanol (3.3 mM) was pre-electrolyzed at 5 mA for 43 min (the time required to pass 2 eq of electrons); dimer **1a** (3.3 mM) was then added to the stirring catholyte at  $t = 0$ , and current and stirring were continued for the duration of the reaction.

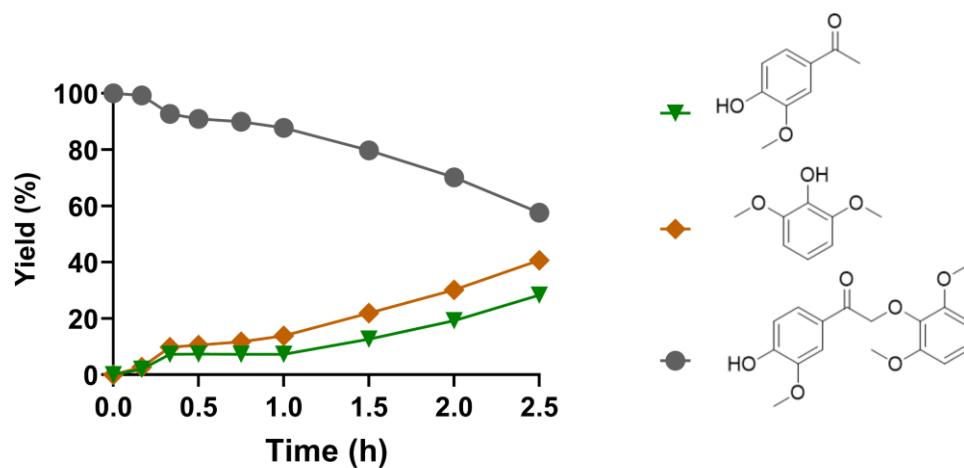

**Figure S15.** Cleavage of dimer **1b** with current alone. Procedure: dimer **1b** (3.1 mM) was added to the catholyte at  $t = 0$ , and current (5 mA) and stirring were continued for the duration of the reaction.

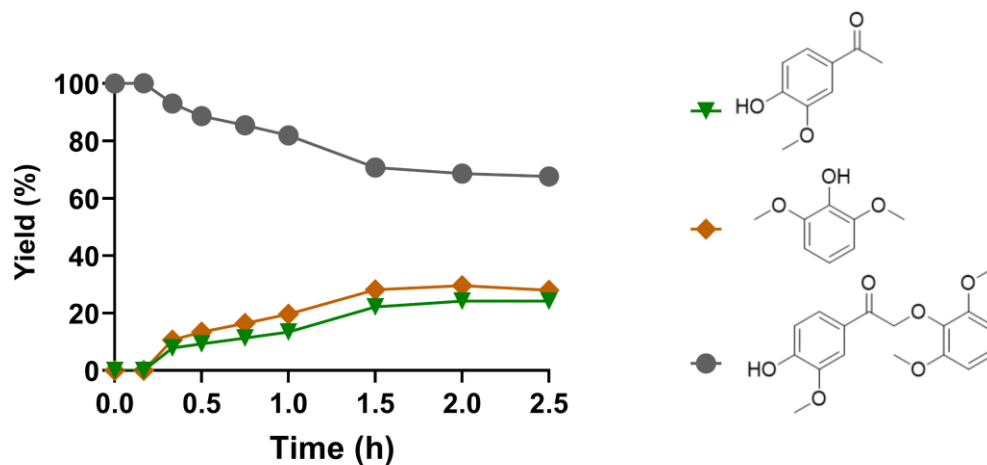

**Figure S16.** Cleavage of dimer **1b** with 2,2'-dithiodiethanol, pre-electrolyzed for 40 min. Procedure: 2,2'-dithiodiethanol (3.1 mM) was pre-electrolyzed at 5 mA for 40 min (the time required to pass 2 eq of electrons); dimer **1b** (3.1 mM) was then added to the stirring catholyte at  $t = 0$ , and current and stirring were continued for the duration of the reaction.

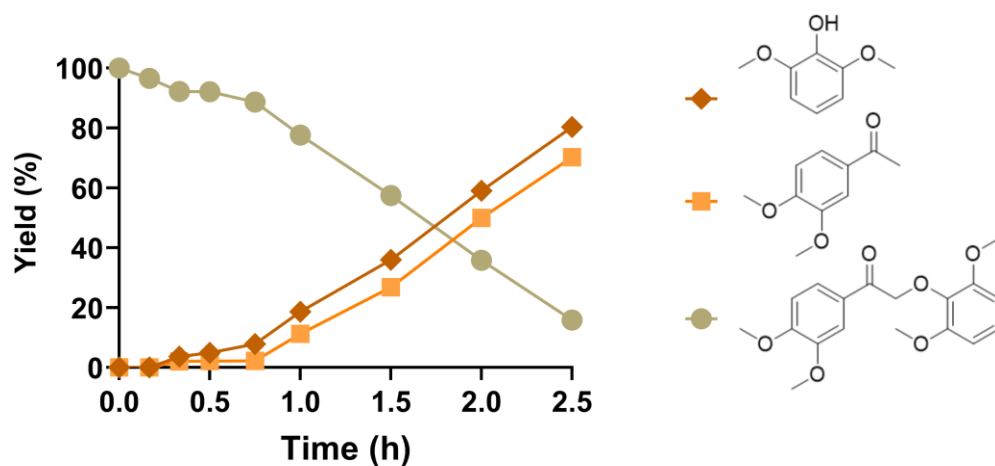

**Figure S17.** Cleavage of dimer **1c** with current alone. Procedure: dimer **1c** (3.0 mM) was added to the catholyte at  $t = 0$ , and current (5 mA) and stirring were continued for the duration of the reaction.

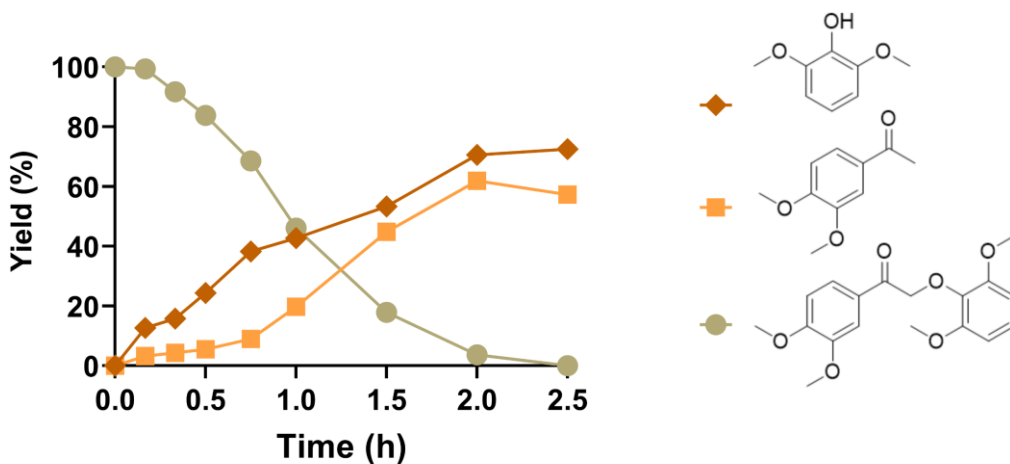

**Figure S18.** Cleavage of dimer **1c** with 2,2'-dithiodiethanol, pre-electrolyzed for 40 min. Procedure: 2,2'-dithiodiethanol (3.0 mM) was pre-electrolyzed at 5 mA for 40 min (the time required to pass 2 eq of electrons); dimer **1c** (3.0 mM) was then added to the stirring catholyte at  $t = 0$ , and current and stirring were continued for the duration of the reaction.

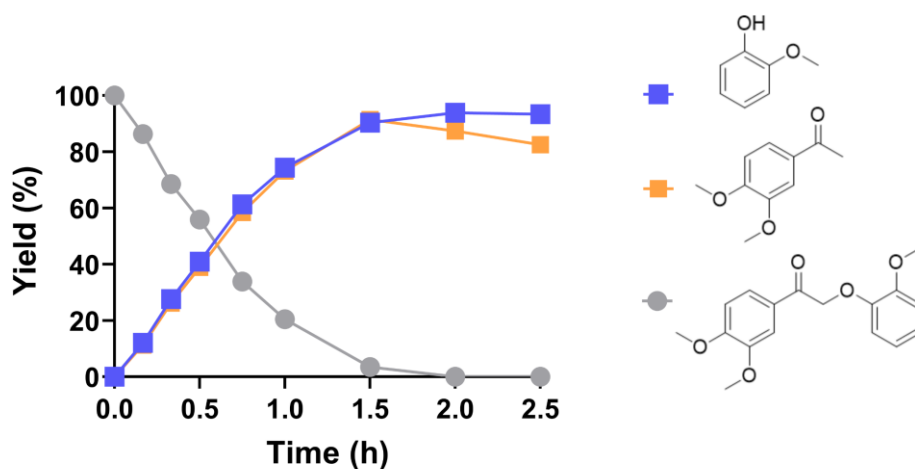

**Figure S19.** Cleavage of dimer **1a** with 2,2'-dithiodiethanol and BHT, pre-electrolyzed for 43 min,. Procedure: 2,2'-dithiodiethanol (3.3 mM) and BHT (3.3 mM) were pre-electrolyzed at 5 mA for 43 min (the time required to pass 2 eq of electrons); dimer **1a** (3.3 mM) was then added to the stirring catholyte at  $t = 0$ , and current and stirring were continued for the duration of the reaction.

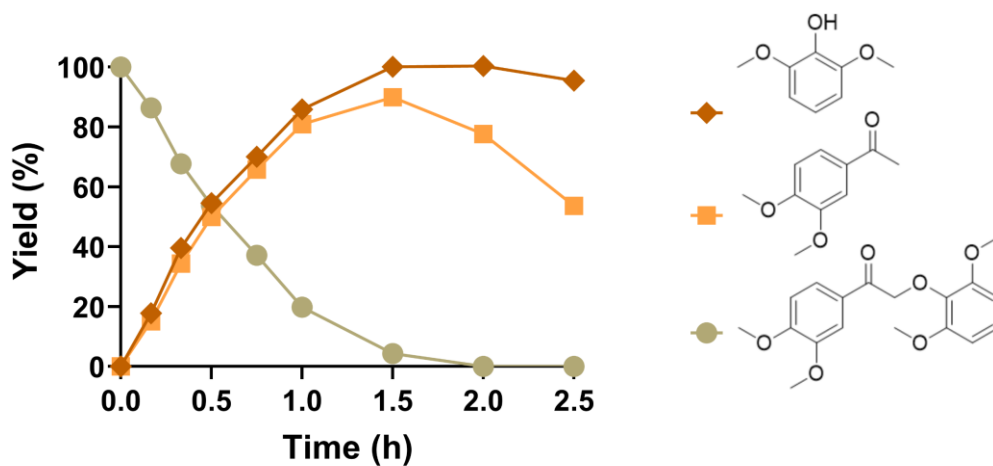

**Figure S20.** Cleavage of dimer **1c** with 2,2'-dithiodiethanol and BHT, pre-electrolyzed for 40 min,. Procedure: 2,2'-dithiodiethanol (3.0 mM) and BHT (3.0 mM) were pre-electrolyzed at 5 mA for 40 min (the time required to pass 2 eq of electrons); dimer **1c** (3.0 mM) was then added to the stirring catholyte at  $t = 0$ , and current and stirring were continued for the duration of the reaction.

## Characterization of thio-assisted electrolysis of lignin<sup>ox</sup>

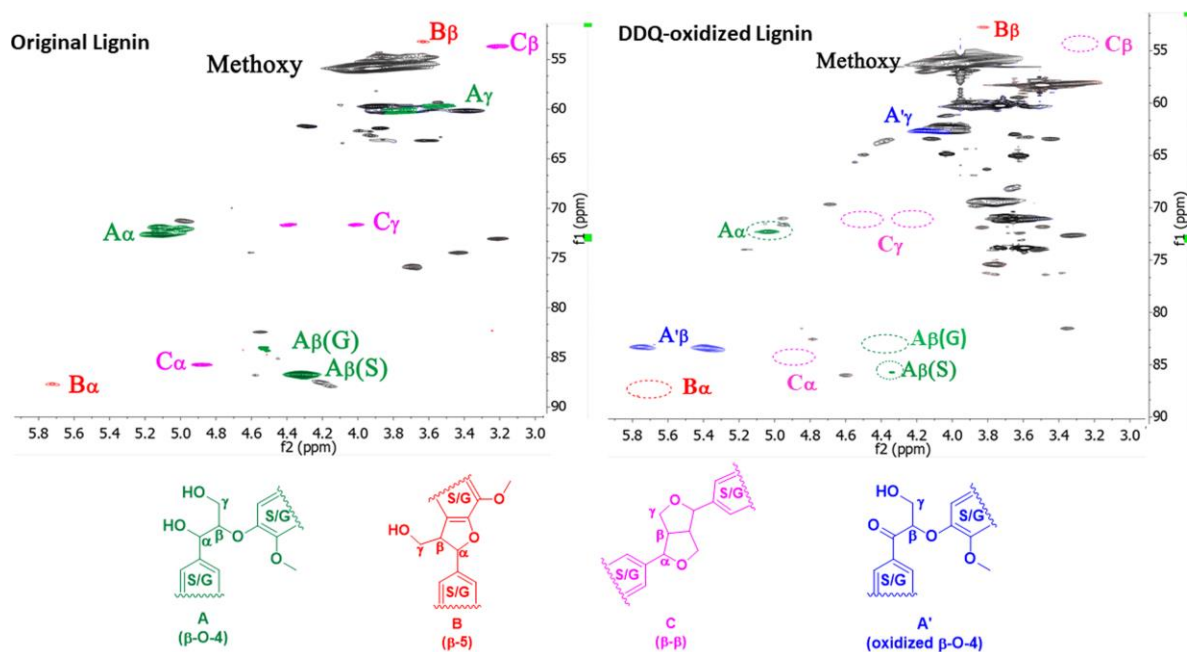

**Figure S21.** 2D HSQC spectra of original lignin and DDQ-oxidized lignin; depletion of the A $\alpha$  cross-peak at 5.1/73 ppm ( $\delta_H/\delta_C$ ) indicates that majority of the  $\alpha$ -OH in the  $\beta$ -O-4 linkages was successfully oxidized to corresponding keto form. As expected, given the benzylic C-H selectivity of DDQ, the primary A $\gamma$  sites are retained in the oxidized product.

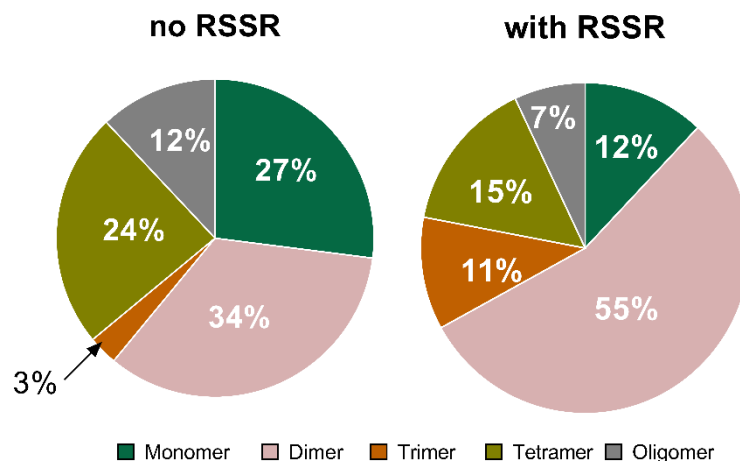

**Figure S22.** Composition of ethyl acetate (EA) soluble fractions from different reactions. Based on relative intensities of molecular weights, the EA-soluble products were categorized as follows: monomer 88-199 g/mol; dimer 200-299 g/mol; trimer 300-399 g/mol; tetramer 400-499 g/mol; oligomer >500 g/mol. Percentage of each category was directly calculated based on the integrated area of each peak using a high-resolution LCMS-QTOF. These pie charts represent the 24 wt% (left) and 36 wt% (right) of ethyl acetate soluble products obtained from the electrolytic cleavage of lignin, respectively.

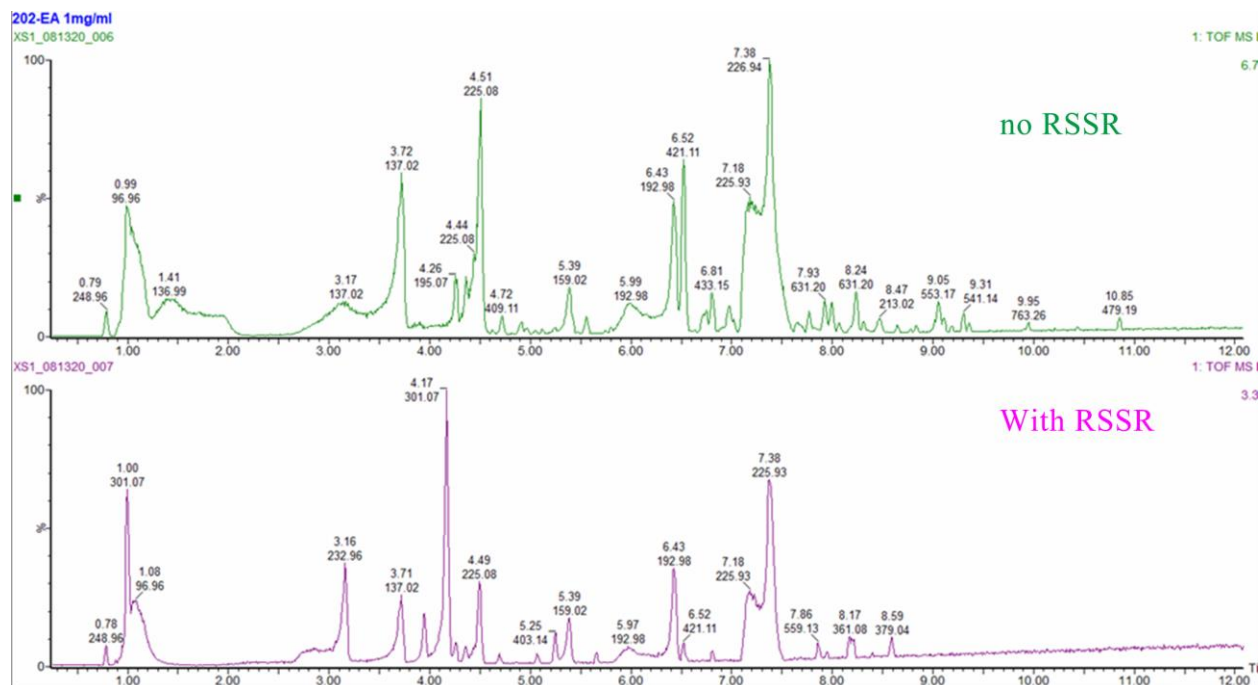

**Figure S23.** LCMS-QTOF chromatograph of the EA-soluble fraction from reaction: without RSSR (top) and with RSSR (bottom).

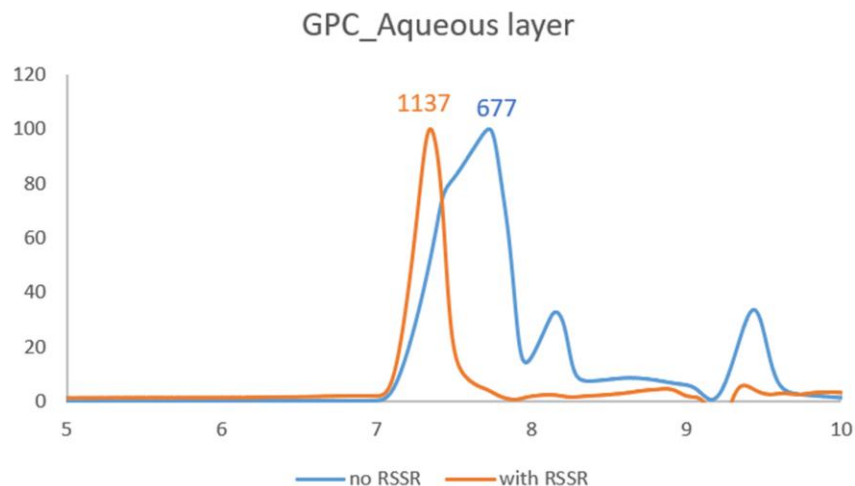

**Figure S24.** GPC chromatogram of the aqueous soluble products from different control reactions. Blue: Mn (number molecular weight) = 651, Mw (weight molecular weight) = 850; Orange: Mn (number molecular weight) = 1159, Mw (weight molecular weight) = 1160; Conditions: Anode: 20 mL of pH 8 phosphate buffer; Cathode: 20 mL of pH 8 phosphate buffer/isopropanol (2:1, v/v).

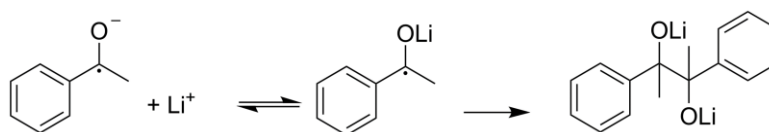

**Scheme S1.**  $\text{Li}^+$  favored the formation of pinacol

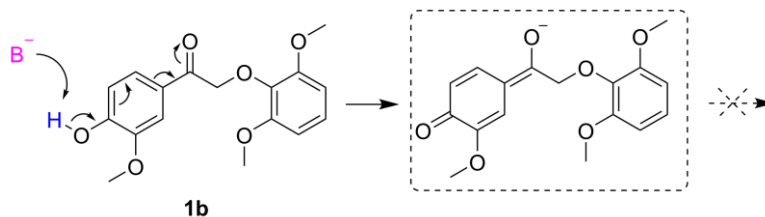

**Scheme S2.** Proposed formation of the quinone methide intermediate, inhibiting the further cleavage of **1b**.

## NMR spectra of dimer 1a-c

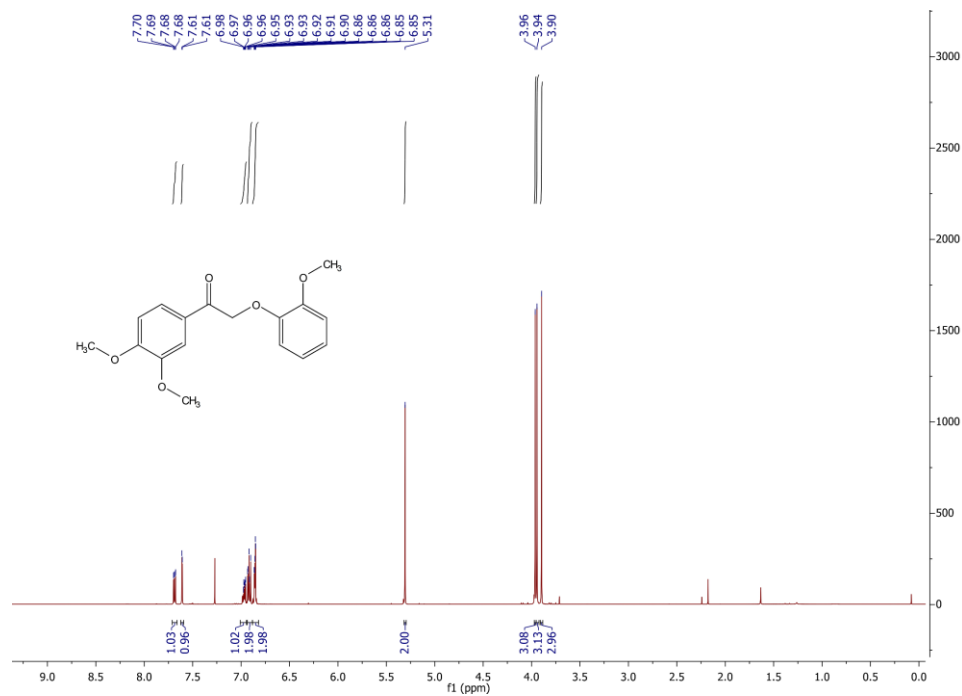

Figure S25. <sup>1</sup>H NMR of dimer 1a

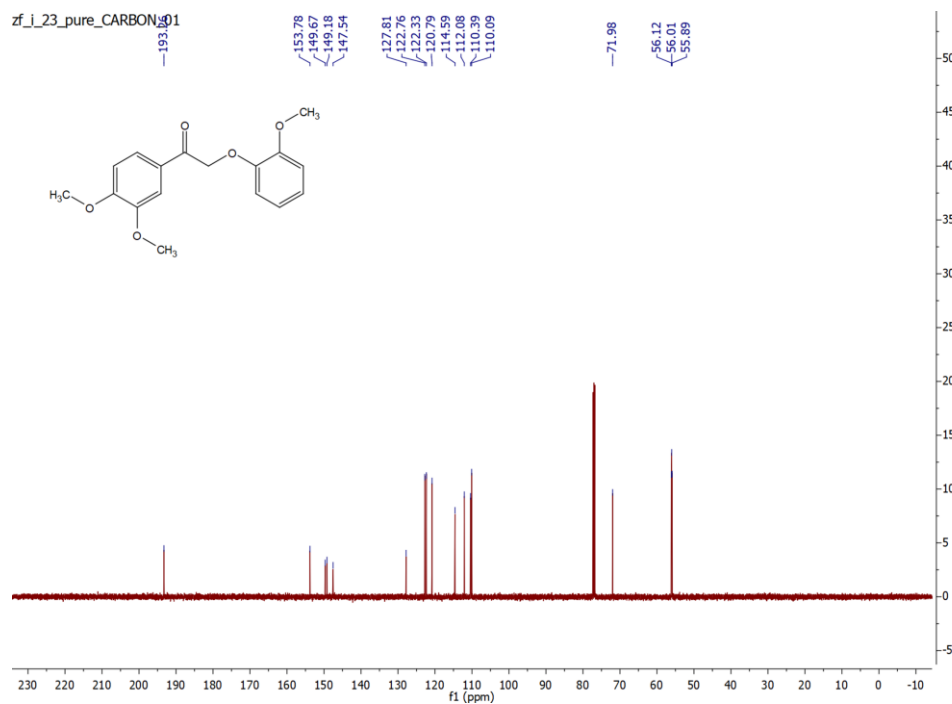

Figure S26. <sup>13</sup>C NMR of dimer 1a



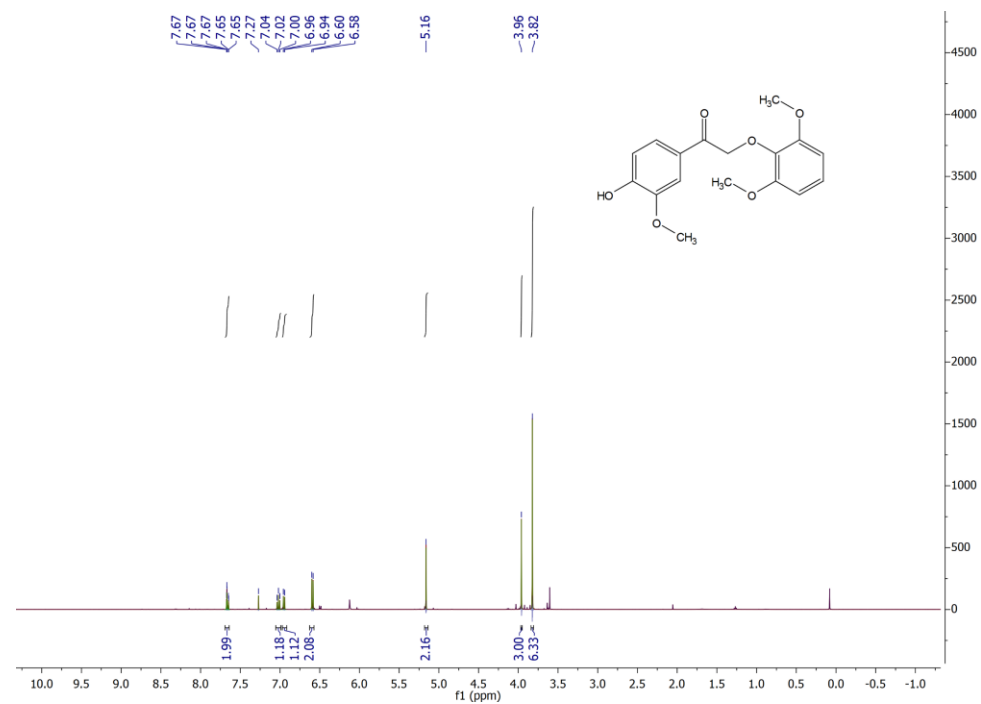

**Figure S27.** <sup>1</sup>H NMR of dimer **1b**

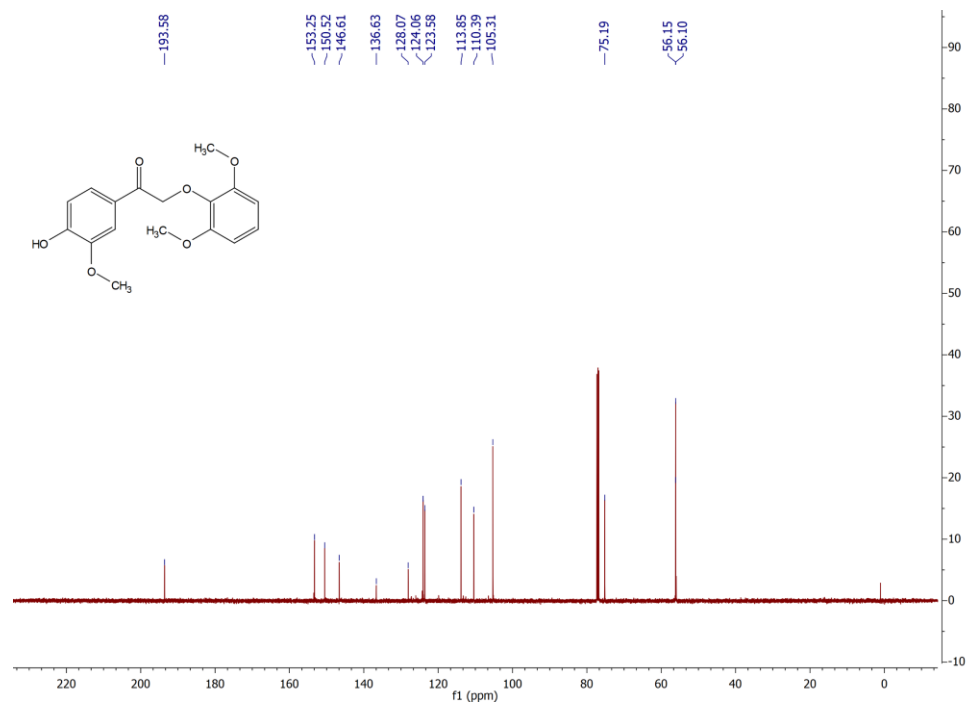

**Figure S28.** <sup>13</sup>C NMR of dimer **1b**

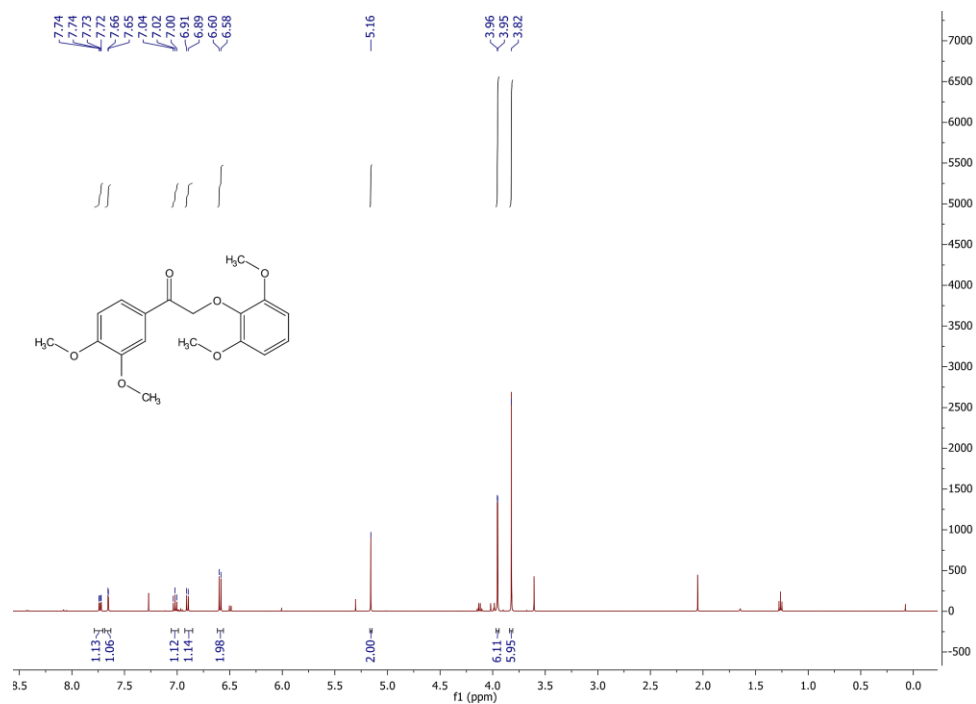

**Figure S29.** <sup>1</sup>H NMR of dimer **1c**

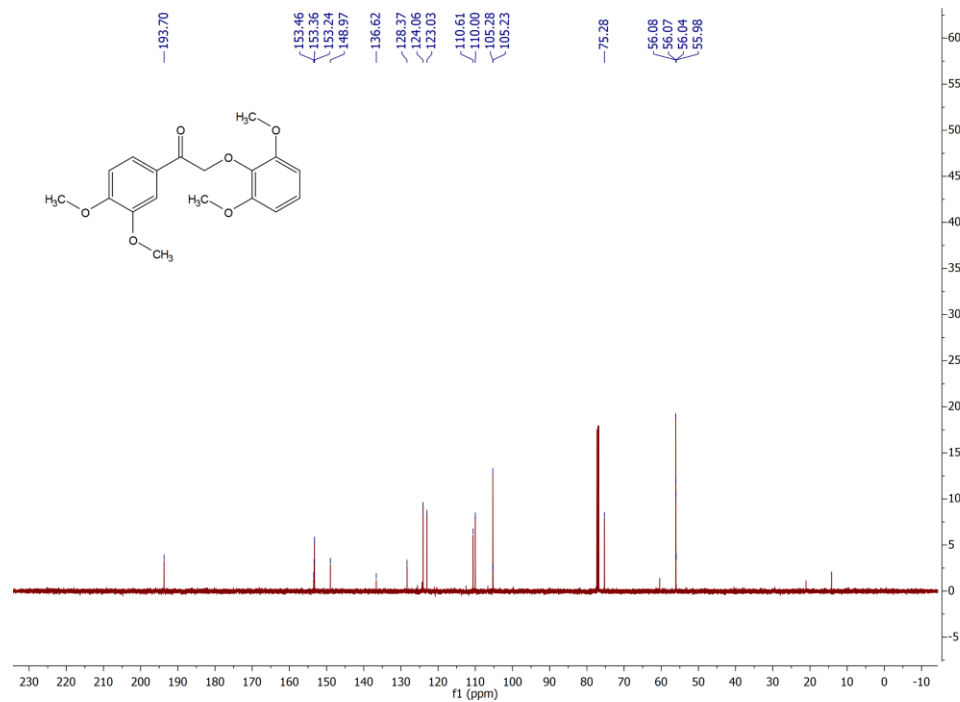

**Figure S30.** <sup>13</sup>C NMR of dimer **1c**

### Cyclic voltammetry of 2,2'-dithiodiethanol

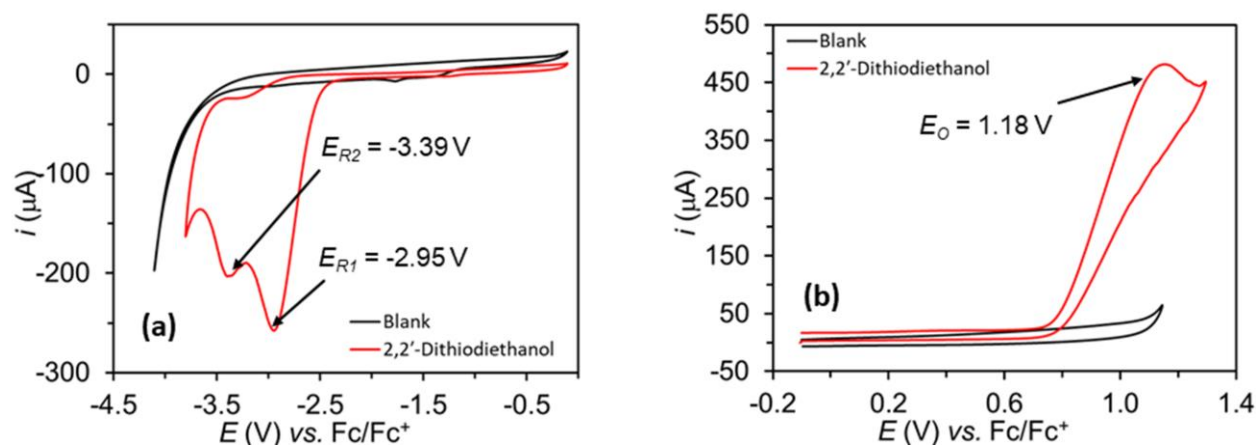

**Figure S31.** CV of 10 mM 2,2'-Dithiodiethanol in DMF containing 0.1 M  $\text{LiBF}_4$  (red trace) and blank solution (black trace). CV condition: working electrode: glassy carbon disk ( $F = 0.07 \text{ cm}^2$ ); counter electrode: Pt disk; reference electrode:  $\text{Ag}/\text{AgNO}_3$  in  $\text{CH}_3\text{CN}$ . Reported Potential vs.  $\text{Fc}/\text{Fc}^+$ . Scan rate: 100 mV/s. (a) Two reduction peaks at -2.95 and -3.39 V were observed. (b) An oxidative potential of 1.18 V was also observed.
